# Supplementary material
Source: PubMed Central journal article supplement (PMC6796909)
Supplement: 41422_2019_193_MOESM2_ESM.pdf [file 41422_2019_193_MOESM2_ESM.pdf]

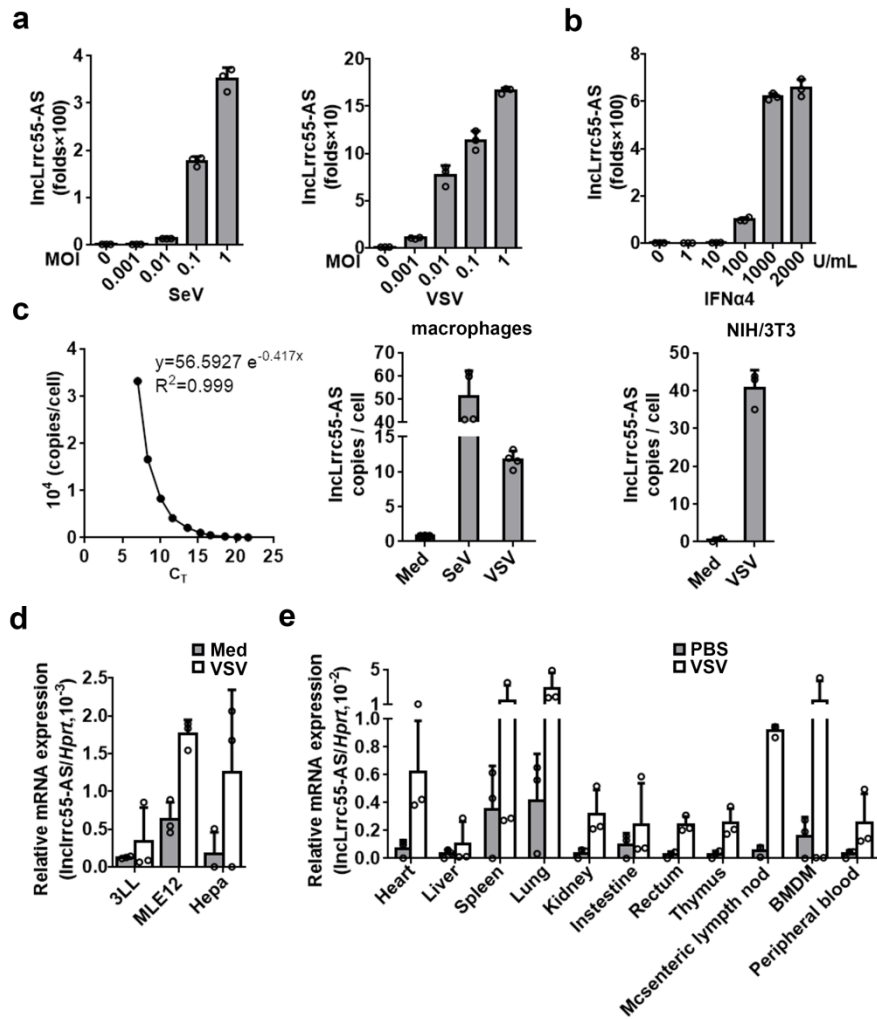

**Supplementary information, Fig. S2** Identification of virus-induced IncLrrc55-AS *in vitro* and *in vivo*. **a, b** RT-qPCR analysis of IncLrrc55-AS expression in macrophages infected with indicated doses of VSV or SeV for 12 hours (**a**) or stimulated with indicated doses of recombinant IFN $\alpha$  4 for 8 hours (**b**). **c** Copy-number analysis of IncLrrc55-AS expression in macrophages or NIH/3T3 cells infected with virus for 12 hours by RT-qPCR. Standard curve was generated using plasmid DNA expressing IncLrrc55-AS. **d, e** RT-qPCR analysis of IncLrrc55-AS expression in cell lines or organs of mice infected with VSV for 12 hours. Data are normalized to the expression of hypoxanthine phosphoribosyltransferase (*Hprt*) reference gene. Data are shown as mean  $\pm$  SEM and from three independent experiments.
