# Supplementary material
Source: PubMed Central journal article supplement (PMC6796909)
Supplement: 41422_2019_193_MOESM4_ESM.pdf [file 41422_2019_193_MOESM4_ESM.pdf]

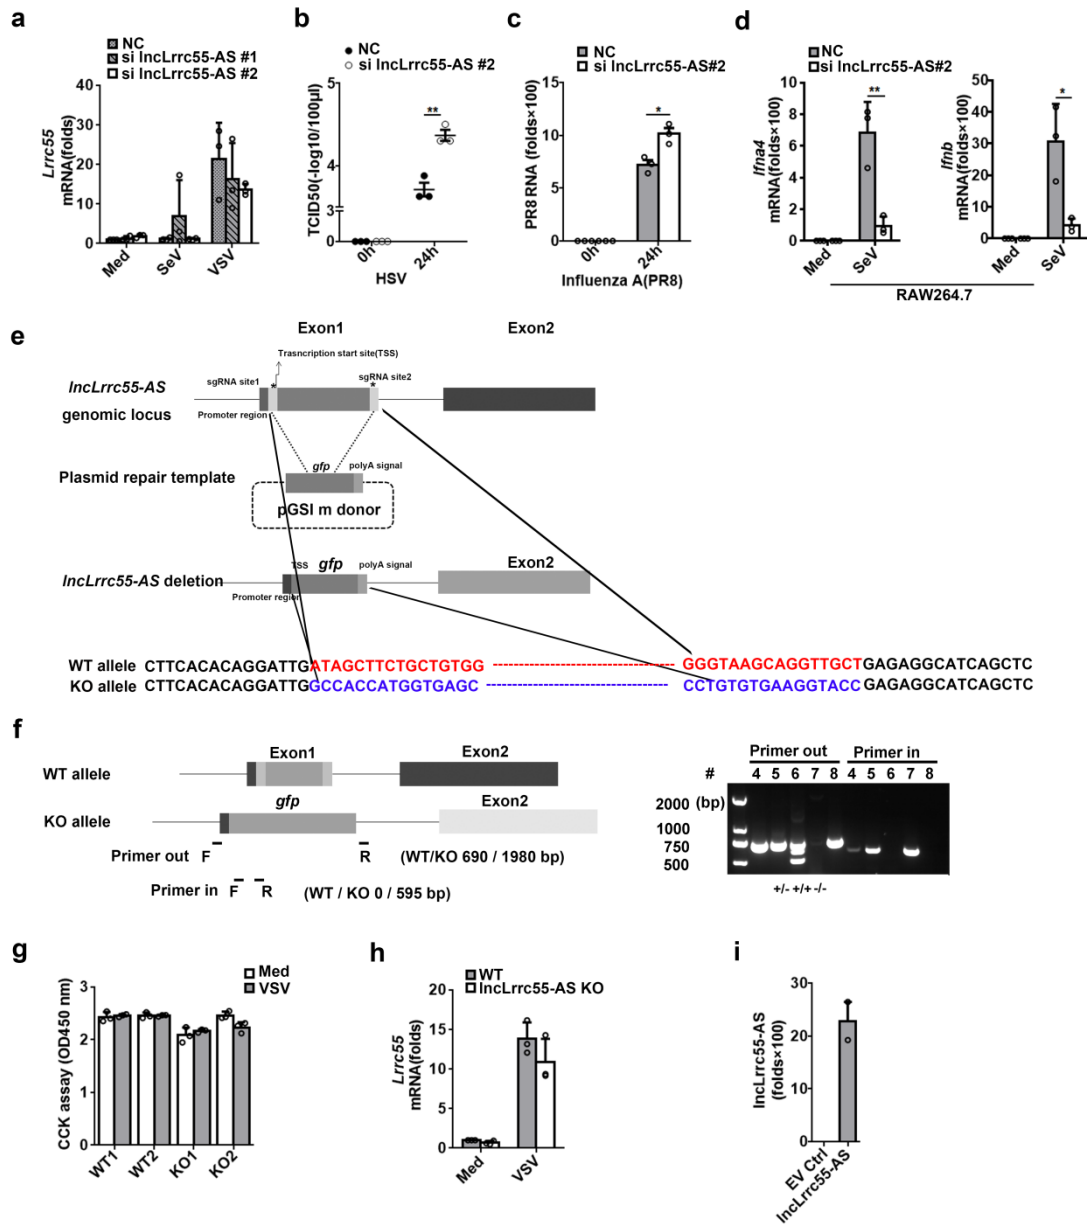

**Supplementary information, Fig. S4** IncLrrc55-AS enhances IFN-I production in response to viral infection. **a** RT-qPCR analysis of *Lrrc55* mRNA expression in non-target siRNA control (NC) or IncLrrc55-AS-silenced macrophages infected with SeV or VSV for 12 hours. **b** Determination of virus loads in the supernatant from HSV infected macrophages for indicated hours by TCID50 assay. **c** Determination of Influenza A virus (PR8 strain) replication in macrophages by RT-qPCR. **d** RT-qPCR analysis of *Ifna4*, *Ifnb* mRNA expression in NC or IncLrrc55-AS-silenced RAW 264.7

cells infected with SeV for 12 hours. **e** Strategy used in generating IncLrrc55-AS KO cell or *IncLrrc55-AS*<sup>-/-</sup> mouse. The IncLrrc55-AS KO cell or *IncLrrc55-AS*<sup>-/-</sup> mouse were generated by replacing the genomic locus encoding the first exon of IncLrrc55-AS transcript with a *gfp* cassette following a poly A signal under the control of endogenous promoter of *IncLrrc55-AS*. **f** Identification of the selected cell clones. The “prime out” band was 1980bp (*IncLrrc55-AS* knock out & *gfp* knocked in) or 690bp (WT); the “primer in” band was 595bp (*IncLrrc55-AS* knock out & *gfp* knocked in) or no band (WT). **g** Cell proliferation analysis of two selected monoclonal WT or IncLrrc55-AS KO NIH/3T3 cell clones infected with VSV for 12 hours by using CCK-8. **h** RT-qPCR analysis of LRRC55 mRNA expression in selected monoclonal WT or IncLrrc55-AS KO NIH/3T3 cells infected with VSV for 12 hours. **i** RT-qPCR analysis of IncLrrc55-AS expression efficiency of plasmid. Data are from three independent experiments (**a-d, g-i**; mean  $\pm$  SEM) or are representative of three independent experiments with similar results (**f**). \* $P < 0.05$ ; \*\* $P < 0.01$  (Student’s *t*-test or ANOVA).
