# Supplementary material
Source: PubMed Central journal article supplement (PMC6796909)
Supplement: 41422_2019_193_MOESM7_ESM.pdf [file 41422_2019_193_MOESM7_ESM.pdf]

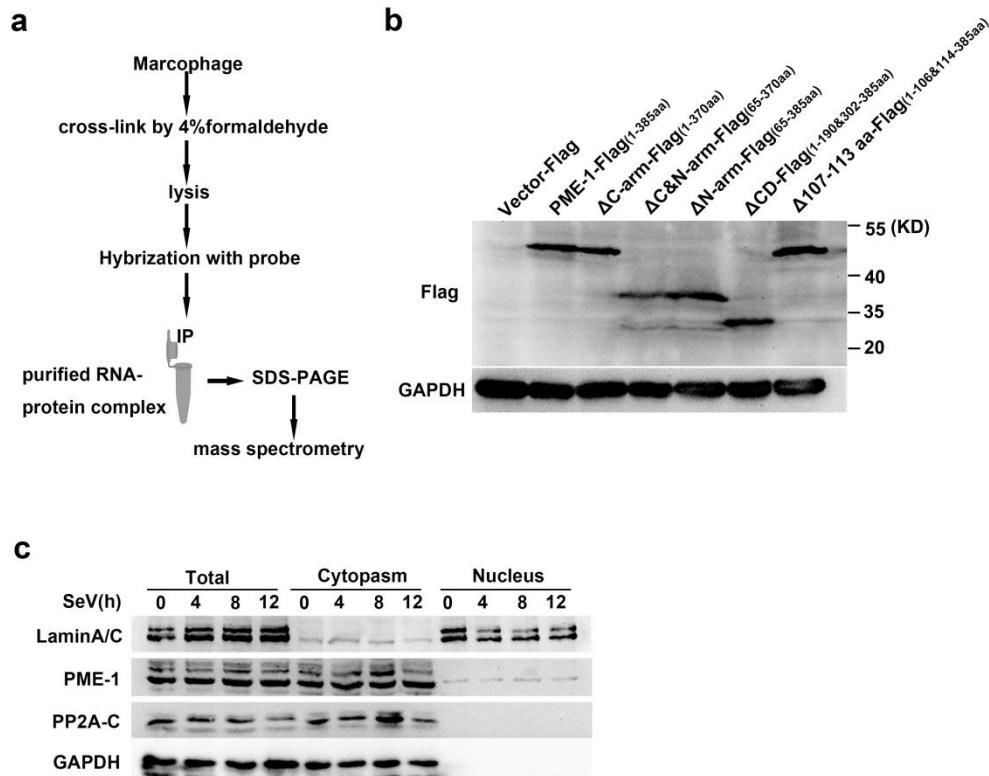

**Supplementary information, Fig. S7** Identification of enzyme PME-1 as IncLrrc55-AS-binding partner. **a** Schematic for IncLrrc55-AS-associated proteins copurified by hybridizing with antisense-IncLrrc55-AS probes from whole cell extracts of SeV infected, and following cross-linking macrophages (4% formaldehyde). **b** Western blot analysis of full-length or domain truncated PME-1-Flag in the RIP assay within NIH/3T3 cells transfected with indicated vectors. **c** Western blot analysis for PME-1 cellular location following nucleus/cytoplasm fractionation obtained from peritoneal macrophages infected with SeV for indicated hours. Data are representative of three independent experiments with similar result (**b** and **c**).
