# Supplementary material
Source: PubMed Central journal article supplement (PMC6796909)
Supplement: 41422_2019_193_MOESM8_ESM.pdf [file 41422_2019_193_MOESM8_ESM.pdf]

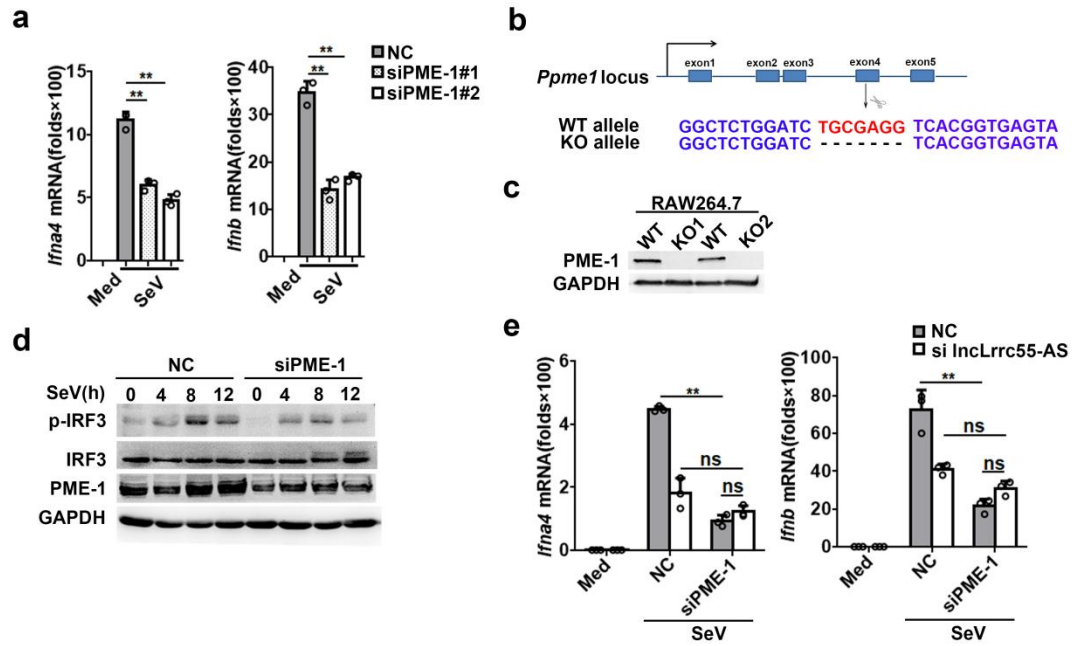

**Supplementary information, Fig. S8** PME-1 positively regulates the production of type I IFN in response to viral infection. **a** RT-qPCR analysis of *Ifna4*, *Ifnb* mRNA expression in control or PME-1-silenced peritoneal macrophages infected with SeV for 12 hours. **b** The genomic architecture of *Ppme1* gene, and the knock out site of *Ppme1* gene. **c** Western blot analysis of the knock out efficiency of PME-1 in the selected RAW264.7 cell clones. **d** Western blot analysis of phosphorylated (p-) or total proteins in lysates of control and PME-1-silenced peritoneal macrophages infected with SeV for indicated hours. **e** RT-qPCR analysis of *Ifna4*, *Ifnb* mRNA expression in NC control and PME-1 or lncLrrc55-AS (or synchronously) silenced peritoneal macrophages infected with SeV for 12 hours. Data are from three independent experiments (**a** and **e**, mean  $\pm$  SEM) or are representative of three independent experiments with similar results (**c** and **d**). \*\*P < 0.01; ns, no significance (Student's *t*-test or ANOVA).
