# Supplementary material
Source: PubMed Central journal article supplement (PMC6796909)
Supplement: 41422_2019_193_MOESM10_ESM.pdf [file 41422_2019_193_MOESM10_ESM.pdf]

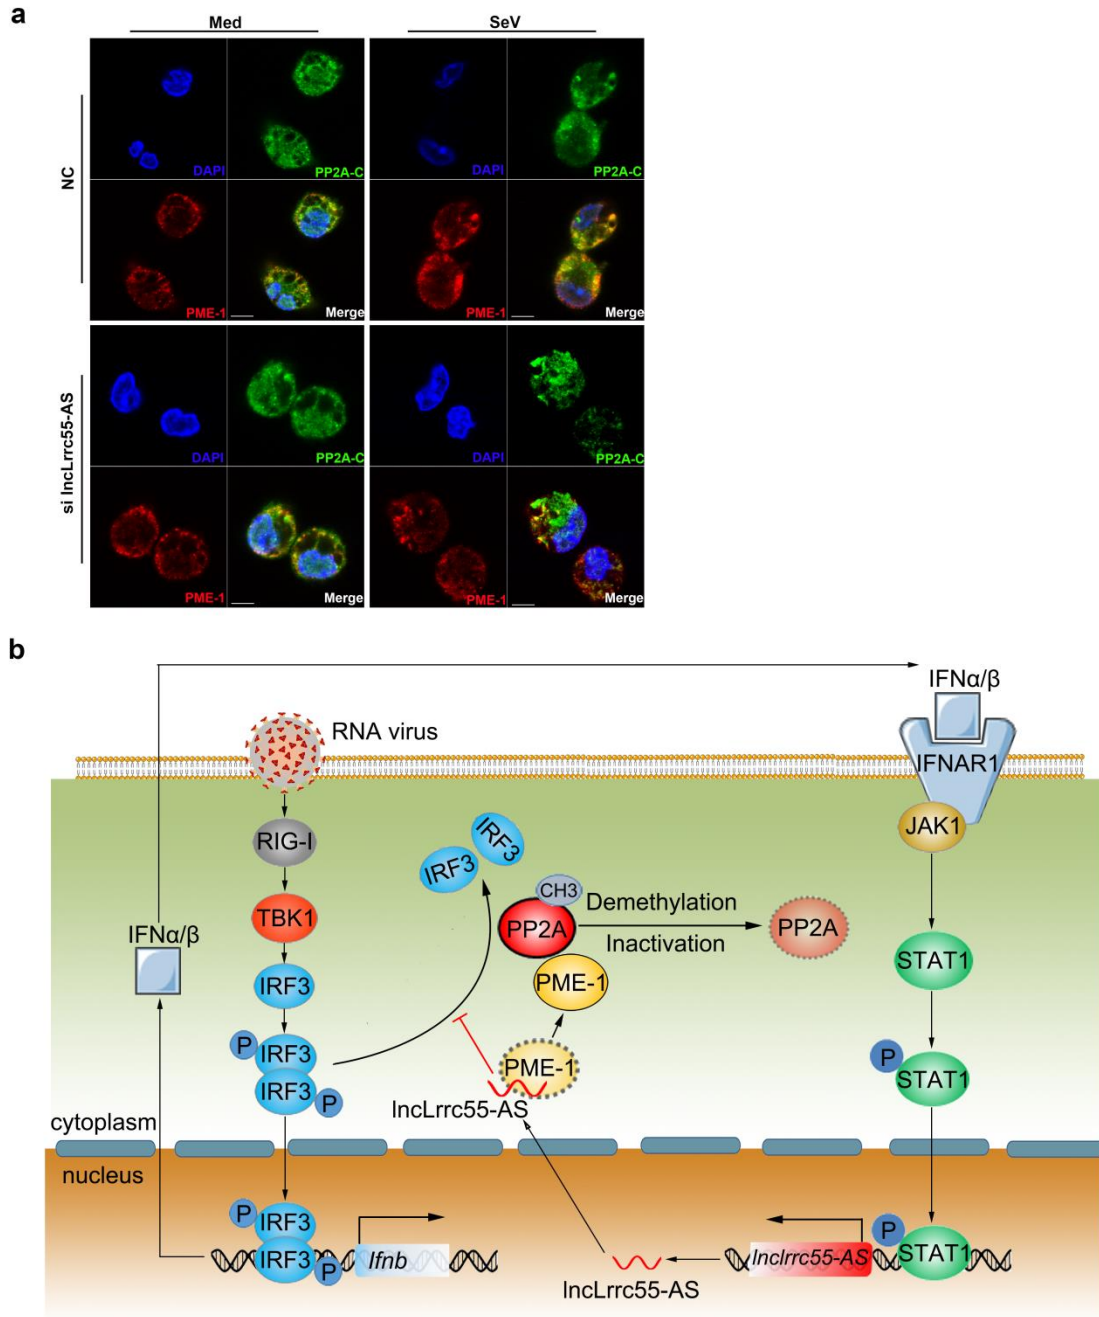

**Supplementary information, Fig. S10** IncLrrc55-AS promotes the interaction of PME-1 and PP2A. **a** IF detection of the endogenous PME-1 and PP2A-C in NC or IncLrrc55-AS-silenced peritoneal macrophages infected with or without SeV for 12 hours. DNA (blue) was stained by DAPI and PP2A-C (green) and PME-1 (red) were detected by antibodies. Scale bars, 10  $\mu$ m. Data are representative of three independent

experiments with similar results. **b** Working model of type I interferon-inducible lncLrrc55-AS feedback promotes type I interferon production in antiviral immunity by binding methyltransferase PME-1 to strengthen IRF3 signaling. lncLrrc55-AS is upregulated by IFN-JAK-STAT signal pathway in response to viral infection or other innate stimuli. The cytoplasmic lncLrrc55-AS directly binds to methyltransferase PME-1 and promotes PME1 to catalyze demethylation and inactivation of PP2A, thus inhibiting PP2A-mediated dephosphorylation of IRF3. As a consequence, lncLrrc55-AS strengthens IRF3 phosphorylation and empowers IRF3-initiated induction of type I IFN in antiviral innate immunity.
