# Supplementary material
Source: PubMed Central journal article supplement (PMC6796909)
Supplement: 41422_2019_193_MOESM11_ESM.pdf [file 41422_2019_193_MOESM11_ESM.pdf]

**Supplementary information, Table S1** Oligonucleotides for QPCR, RIP-QPCR and hybridization assays in this study

| Gens            |              | Oligonucleotides (5'-3')  |
|-----------------|--------------|---------------------------|
| <i>Ifna4</i>    | Forward      | TGATGAGCTACTACTGGTCAGC    |
|                 | Reverse      | GATCTCTTAGCACAAAGGATGGC   |
| <i>Ifnb</i>     | Forward      | ATGAGTGGTGGTTGCAGGC       |
|                 | Reverse      | TGACCTTTCAAATGCAGTAGATTCA |
| VSV             | Forward      | ACGGCGTACTTCCAGATGG       |
|                 | Reverse      | CTCGGTTCAAGATCCAGGT       |
| <i>Hprt</i>     | Forward      | TCAGTCAACGGGGGACATAAA     |
|                 | Reverse      | GGGGCTGTACTGCTTAACCAG     |
| lncLrrc55-AS    | Forward1     | TAGCTTCTGCTGTGGTCTCC      |
|                 | Reverse1     | AGAATAACCAAACACTACAGG     |
| <i>Ppp2ca</i>   | Forward      | ATCATGGACGAGAAGTTGTTC     |
|                 | Reverse      | GAGATCATGAAATTGCCCAT      |
| <i>Isg15</i>    | Forward      | GAGAGGCAGCGAACTCATCT      |
|                 | Reverse      | CTTCAGCTCTGACACCGACA      |
| Influnza virusA | Forward      | CCGACATCAACAAGCTGAGA      |
|                 | Reverse      | CCTGTGACGTAAGTCTGCAT      |
| lincRNA-Cox2    | Forward      | AAGGAAGCTTGGCGTTGTGA      |
|                 | Reverse      | GAGAGGTGAGGAGTCTTATG      |
| <i>Lrrc55</i>   | Forward      | ATGGGCTCCCTACAGCACT       |
|                 | Reverse      | AGTCCACTACTTGGTTACGACA    |
| U6              | Forward      | ATGGCGGACGACGTAGATCA      |
|                 | Reverse      | AGCTCTCGGTCATTTCTCATTTT   |
| Hybridization   |              | Oligonucleotides (5'-3')  |
| FISH            | #1           | CAAATGCTGCAGGCTGGAAG      |
|                 | #2           | TCTGTCCCTGAGCAAGAG        |
|                 | #3           | AAACTACAGGGTCCCTTTTA      |
| CHIRP           | Probe poolsA | CAAATGCTGCAGGCTGGAAG      |
|                 |              | CTGTAAGTGTGCCCACTGAC      |
|                 | Probe poolsB | ACCACAGCAGAAGCTATCAA      |
|                 |              | TCTGTCCCTGAGCAAGAG        |
|                 |              | AAACTACAGGGTCCCTTTTA      |
