# Supplementary material
Source: PubMed Central journal article supplement (PMC6796909)
Supplement: 41422_2019_193_MOESM12_ESM.pdf [file 41422_2019_193_MOESM12_ESM.pdf]

**Supplementary information, Table S2** Full-length sequence of lncLrrc55-AS as determined by RACE

---

TAGCTTCTGCTGTGGTCTCCTGGGGAAGGCCTTCCAGCCTGCAGCATTG  
TAACTCTGCTGTCACCAAGTGTTATAGAGGTCACCCCGGAGAAGACTCTT  
GCTCAGGGACAGATGGAGCCTCACTCATTGGGATGAGCCAGGACCCTGG  
TCAGTGGGCACAGTTACAGGTGCCGAGGAGTCTTAGAACTGTCCAAGCA  
GAACAGAGCTAAAAGGGACCCTGTAGTTTGGTTATTCTGGTAACTTCTCT  
TTATGGCTGAATAAAGATCAAAATGGGTAAGGAATGTCAAAAAAAAAAAA  
AAAAAAAAAAAAAAAA

---
