# Supplementary material
Source: PubMed Central journal article supplement (PMC6796909)
Supplement: 41422_2019_193_MOESM13_ESM.pdf [file 41422_2019_193_MOESM13_ESM.pdf]

**Supplementary information, Table S3** Identification of IncLrrc55-AS-binding proteins

| <b>protein</b> | <b>Mass (Da)</b> | <b>peptide sequence</b>        |
|----------------|------------------|--------------------------------|
| Hist3h2a       | 14113            | VGAGAPVYLAADVLEYLTAEILELAGNAAR |
| Psmb8          | 30526            | LYYLR                          |
| Ppme1          | 42628            | IVALDLR                        |
| Hsd11b2        | 42616            | VLEITK                         |
| Slc25a3        | 40063            | IIMIGTLTALQWFIYDSVK            |
| Ddx39a         | 49549            | LFDLLDVLEFNQVVIFVK             |
